# Supplementary material for: Metabolic diversity and niche structure in sponges from the Miskito Cays, Honduras
Source: PeerJ. 2014 Dec 16;2:e695. doi: 10.7717/peerj.695 (PMC4273936; doi:10.7717/peerj.695)
Supplement: Supplemental Information 1 [file peerj-02-695-s001.xls]

## Sheet: Isotope Data
Site Name	Site Number	Species	d15N	d13C
Becerros	Site 2	Acau	2.42	-19.24
Becerros	Site 2	Acau	3.2609	-19.2185
Becerros	Site 2	Acau	2.0482	-19.8886
Media Luna	Site 1	Acau	1.9365	-18.0716
Media Luna	Site 1	Acau	2.0055	-18.8423
Media Luna	Site 3	Acau	1.8402	-19.2535
Media Luna	Site 3	Acau	2.5102	-19.4179
Media Luna	Site 3	Acau	2.1147	-19.4883
Caratasca	Site 2	Acau	3.3963	-19.9334
Media Luna	Site 4	Acau	2.6019	-18.8781
Media Luna	Site 4	Acau	1.9892	-19.2719
Media Luna	Site 4	Acau	3.1706	-18.2349
Media Luna	Site 4	Acau	2.9349	-19.1499
Vivorillos	Site 2	Acau	2.1929	-19.4848
Vivorillos	Site 2	Acau	2.3824	-19.049
Vivorillos	Site 2	Acau	1.7959	-19.1689
Vivorillos	Site 2	Acau	3.0796	-18.6069
Media Luna	Site 2	Acau	1.6965	-19.3438
Media Luna	Site 2	Acau	2.3594	-18.7691
Media Luna	Site 2	Acau	2.8553	-19.0397
Media Luna	Site 2	Acau	2.9224	-18.5695
Media Luna	Site 2	Acau	2.1604	-19.1415
Caratasca	Site 1	Acau	3.35	-18.6733
Becerros	Site 1	Acom	5.35	-20
Becerros	Site 1	Acom	5.48	-19.79
Becerros	Site 1	Acom	5.15	-19.6
Becerros	Site 1	Acom	5.52	-19.58
Becerros	Site 1	Acom	5.35	-19.17
Media Luna	Site 2	Acom	4.67	-18.48
Media Luna	Site 2	Acom	4.9	-19.4
Media Luna	Site 2	Acom	4.73	-18.97
Media Luna	Site 2	Acom	4.56	-19.02
Media Luna	Site 1	Acom	5.45	-16.92
Media Luna	Site 1	Acom	5.67	-17.73
Media Luna	Site 1	Acom	4.92	-17.94
Media Luna	Site 1	Acom	4.93	-18.13
Media Luna	Site 3	Acom	4.8517	-18.1891
Media Luna	Site 3	Acom	4.385	-18.3942
Media Luna	Site 3	Acom	4.0399	-18.0071
Media Luna	Site 3	Acon	5.3653	-17.0933
Media Luna	Site 3	Acon	4.6827	-17.152
Media Luna	Site 3	Acon	4.7753	-17.5008
Media Luna	Site 3	Acon	3.5684	-17.5092
Media Luna	Site 2	Acon	4.139	-17.0095
Media Luna	Site 2	Acon	4.8724	-17.3437
Media Luna	Site 4	Acra	3.3139	-17.6831
Media Luna	Site 4	Acra	3.0428	-17.5988
Media Luna	Site 4	Acra	2.8167	-17.5911
Media Luna	Site 3	Acra	2.9063	-17.4123
Media Luna	Site 3	Acra	2.9225	-17.7613
Media Luna	Site 3	Acra	3.4013	-17.4308
Media Luna	Site 2	Aful	2.01	-19.35
Media Luna	Site 2	Aful	2.44	-19.54
Media Luna	Site 2	Aful	2.64	-18.98
Caratasca	Site 1	Aful	2.77	-19.4
Caratasca	Site 1	Aful	3.11	-18.92
Caratasca	Site 1	Aful	3.38	-19
Caratasca	Site 1	Aful	2.86	-19.73
Caratasca	Site 1	Aful	2.63	-20.02
Caratasca	Site 2	Aful	2.52	-20.64
Caratasca	Site 2	Aful	2.51	-20.51
Caratasca	Site 2	Aful	2.15	-19.91
Caratasca	Site 2	Aful	2.56	-20.6
Caratasca	Site 2	Aful	1.9	-21.36
Media Luna	Site 1	Aful	3.27	-19.11
Media Luna	Site 1	Aful	1.79	-19.72
Media Luna	Site 1	Aful	1.24	-19.92
Media Luna	Site 1	Aful	1.97	-19.9
Media Luna	Site 4	Aful	1.64	-19.72
Media Luna	Site 4	Aful	1.42	-19.65
Media Luna	Site 4	Aful	2.34	-19.49
Vivorillos	Site 2	Aful	1.52	-19.45
Vivorillos	Site 2	Aful	1.77	-19.67
Vivorillos	Site 2	Aful	1.31	-19.92
Becerros	Site 1	Awie	5.1198	-17.4024
Becerros	Site 1	Awie	4.6972	-17.2698
Becerros	Site 1	Awie	5.6707	-17.474
Becerros	Site 1	Awie	5.5687	-17.1132
Vivorillos	Site 1	Awie	4.6742	-17.3219
Vivorillos	Site 1	Awie	4.9334	-17.5913
Media Luna	Site 2	Ccar	2.9917	-17.9918
Media Luna	Site 2	Ccar	1.62563	-17.5734
Media Luna	Site 2	Ccar	3.0093	-17.6618
Media Luna	Site 2	Ccar	2.0111	-18.3682
Media Luna	Site 2	Ccar	1.6247	-18.3413
Becerros	Site 2	Cfal	5.0406	-16.7109
Becerros	Site 2	Cfal	4.9274	-17.0302
Becerros	Site 2	Cfal	4.9991	-16.3818
Caratasca	Site 1	Cfal	4.6836	-17.93
Caratasca	Site 1	Cfal	4.4475	-18.1078
Caratasca	Site 1	Cfal	4.3198	-17.5449
Caratasca	Site 1	Cfal	4.3921	-17.6392
Caratasca	Site 1	Cfal	4.5676	-17.7009
Media Luna	Site 3	Cfal	4.133	-16.3661
Media Luna	Site 3	Cfal	4.1122	-16.0226
Media Luna	Site 2	Cfal	4.4091	-16.3731
Media Luna	Site 2	Cfal	4.1112	-16.3256
Media Luna	Site 2	Cfal	4.5342	-15.9492
Media Luna	Site 3	Cpli	4.2942	-16.7199
Media Luna	Site 2	Cpli	4.3226	-17.3112
Media Luna	Site 2	Cpli	4.519	-17.0404
Caratasca	Site 1	Cvag	4.8569	-17.4827
Caratasca	Site 1	Cvag	4.3809	-18.1566
Caratasca	Site 1	Cvag	4.1261	-17.8547
Caratasca	Site 1	Cvag	4.4002	-17.6674
Caratasca	Site 1	Cvag	3.7908	-17.8579
Caratasca	Site 1	Cvag	4.229	-17.4398
Media Luna	Site 2	Cvag	3.2168	-16.9497
Media Luna	Site 2	Cvag	3.3579	-17.0755
Media Luna	Site 2	Cvag	4.121	-16.9764
Media Luna	Site 2	Cvag	3.0778	-17.6966
Media Luna	Site 2	Cvag	3.3844	-17.5731
Media Luna	Site 2	Cvag	3.3155	-17.1696
Media Luna	Site 3	Cvag	3.2889	-17.2754
Media Luna	Site 3	Cvag	3.565	-16.5236
Media Luna	Site 3	Cvag	3.54	-16.5918
Vivorillos	Site 2	Cvag	4.0754	-17.4708
Vivorillos	Site 2	Cvag	4.215	-17.1346
Vivorillos	Site 2	Cvag	4.354	-16.9735
Vivorillos	Site 2	Cvag	4.1663	-17.0918
Vivorillos	Site 2	Cvag	3.267	-17.9032
Media Luna	Site 4	Danc	3.8135	-17.6071
Media Luna	Site 4	Danc	4.4662	-17.2544
Media Luna	Site 4	Danc	4.2595	-17.535
Media Luna	Site 4	Danc	3.7804	-17.7113
Media Luna	Site 3	Efer	1.79882	-19.0776
Media Luna	Site 3	Efer	1.543	-18.9035
Media Luna	Site 3	Efer	2.1477	-18.9737
Caratasca	Site 1	Ibir	4.3773	-18.3855
Caratasca	Site 1	Ibir	4.5046	-18.5282
Caratasca	Site 1	Ibir	4.5777	-18.3203
Vivorillos	Site 2	Ibir	4.5395	-17.7895
Vivorillos	Site 2	Ibir	3.5207	-18.0376
Vivorillos	Site 2	Ibir	4.4002	-18.0283
Media Luna	Site 2	Ibir	3.9946	-17.1227
Media Luna	Site 2	Ibir	4.0092	-17.026
Media Luna	Site 2	Ibir	3.6204	-17.0888
Becerros	Site 2	Ibir	4.3251	-17.7096
Becerros	Site 2	Ibir	4.6482	-17.3196
Becerros	Site 2	Ibir	4.4512	-17.4074
Caratasca	Site 2	Ibir	4.3985	-18.7671
Caratasca	Site 2	Ibir	4.762	-17.8561
Caratasca	Site 2	Ibir	4.4825	-17.9945
Media Luna	Site 3	Ibir	3.7897	-17.1619
Media Luna	Site 3	Ibir	3.9055	-17.3402
Media Luna	Site 3	Ibir	4.1625	-17.3713
Media Luna	Site 3	Ibir	4.3641	-17.0224
Media Luna	Site 3	Ibir	3.9517	-17.415
Media Luna	Site 3	Ibir	3.8389	-17.6865
Caratasca	Site 1	Icam	1.3214	-17.9141
Caratasca	Site 1	Icam	1.8647	-18.3903
Caratasca	Site 1	Icam	1.6924	-18.2311
Caratasca	Site 1	Icam	2.2833	-17.7626
Caratasca	Site 1	Icam	1.3444	-17.6989
Caratasca	Site 1	Icam	2.7017	-17.7281
Media Luna	Site 2	Icam	1.0371	-16.9874
Media Luna	Site 2	Icam	-0.15765	-17.6414
Media Luna	Site 2	Icam	1.2591	-17.5856
Media Luna	Site 2	Icam	1.9931	-17.047
Media Luna	Site 2	Icam	1.2711	-17.4798
Media Luna	Site 2	Icam	1.0286	-17.4857
Becerros	Site 2	Icam	1.5096	-17.5944
Becerros	Site 2	Icam	1.878	-17.4677
Media Luna	Site 3	Icam	0.7993	-17.4834
Media Luna	Site 3	Icam	0.8958	-17.8139
Media Luna	Site 3	Icam	1.1992	-17.8516
Media Luna	Site 2	Marb	4.027	-17.7433
Media Luna	Site 2	Marb	3.9942	-17.9421
Media Luna	Site 2	Marb	3.7757	-17.3933
Media Luna	Site 2	Marb	3.5789	-18.0099
Media Luna	Site 2	Marb	4.3289	-17.1789
Media Luna	Site 3	Marb	3.5932	-17.8751
Media Luna	Site 3	Marb	3.9653	-17.4757
Media Luna	Site 3	Marb	3.7573	-17.2394
Media Luna	Site 3	Marb	3.8395	-17.1289
Media Luna	Site 3	Marb	3.7677	-16.9523
Media Luna	Site 3	Marb	3.5828	-18.0419
Media Luna	Site 3	Marb	3.9068	-17.9679
Media Luna	Site 3	Marb	3.917	-17.6327
Media Luna	Site 3	Marb	4.2314	-17.4244
Media Luna	Site 3	Mlae	4.1218	-17.2186
Media Luna	Site 3	Mlae	3.232	-16.8628
Media Luna	Site 3	Mlae	2.999	-16.8837
Media Luna	Site 3	Mlae	3.5473	-16.8126
Media Luna	Site 3	Mlae	3.6303	-16.0828
Media Luna	Site 2	Mlae	3.5018	-16.5157
Media Luna	Site 2	Mlae	2.9509	-17.9268
Media Luna	Site 2	Mlae	3.6394	-16.52
Media Luna	Site 2	Nere	3.555	-17.7077
Media Luna	Site 2	Nere	3.5381	-17.6947
Media Luna	Site 2	Nere	3.4885	-17.9586
Media Luna	Site 2	Nere	3.8613	-17.8296
Media Luna	Site 2	Nere	3.8931	-17.3045
Media Luna	Site 2	Nere	4.3208	-17.1379
Media Luna	Site 3	Nere	3.6455	-17.8595
Media Luna	Site 3	Nere	3.8041	-17.3392
Media Luna	Site 3	Nere	3.6859	-17.648
Media Luna	Site 3	Nere	3.2331	-17.9296
Caratasca	Site 1	Nere	4.301	-18.8422
Caratasca	Site 1	Nere	4.356	-18.8416
Caratasca	Site 1	Nere	4.2577	-18.5415
Caratasca	Site 1	Nere	4.3821	-18.0165
Becerros	Site 1	Nere	4.1413	-18.228
Vivorillos	Site 2	Nere	4.1728	-18.3192
Vivorillos	Site 2	Nere	4.0288	-18.2916
Vivorillos	Site 2	Nere	4.5456	-17.6622
Vivorillos	Site 2	Nere	3.9611	-17.2005
Vivorillos	Site 2	Nere	4.0447	-18.3392
Vivorillos	Site 2	Nere	4.2056	-18.1192
Becerros	Site 2	Nros	5.0873	-18.8243
Vivorillos	Site 1	Nros	4.9925	-18.5512
Vivorillos	Site 1	Nros	4.5585	-18.3641
Vivorillos	Site 1	Nros	5.0145	-18.3917
Vivorillos	Site 1	Nros	4.9727	-18.1993
Vivorillos	Site 1	Nros	4.7668	-18.4534
Vivorillos	Site 1	Nros	4.5184	-18.1334
Media Luna	Site 4	Vrig	3.42	-18.07
Media Luna	Site 4	Vrig	3.39	-17.85
Media Luna	Site 4	Vrig	3.35	-17.98
Media Luna	Site 2	Vrig	4.28	-17.28
Media Luna	Site 2	Vrig	3.97	-18.76
Media Luna	Site 2	Vrig	3.84	-18.2
Vivorillos	Site 2	Vrig	4.04	-17.24
Vivorillos	Site 2	Vrig	4.98	-17.07
Media Luna	Site 1	Vrig	4.38	-16.28
Media Luna	Site 1	Vrig	3.4761	-17.1062
Media Luna	Site 1	Vrig	3.8087	-17.2862
Media Luna	Site 1	Vrig	4.107	-16.7797
Media Luna	Site 1	Vrig	2.9802	-17.4774
Caratasca	Site 1	Vrig	4.3956	-17.5022
Caratasca	Site 1	Vrig	2.9686	-17.805
Caratasca	Site 1	Vrig	4.3643	-17.8086
Media Luna	Site 3	Vrig	2.8026	-17.4163
Media Luna	Site 3	Vrig	3.5317	-16.9705
Vivorillos	Site 1	Vrig	4.3004	-17.5282
Vivorillos	Site 1	Vrig	3.6088	-17.4821
Vivorillos	Site 1	Vrig	3.5217	-17.4099
Vivorillos	Site 1	Vrig	4.2422	-17.1695

## Sheet: chlorophyll a data
Species	Site Translation	Chl a (gAFDW sponge)-1
Acau	Becerros 2	170.794
Acau	Becerros 2	129.963
Acau	Becerros 2	366.918
Acau	Caratasca 1	323.787
Acau	Caratasca 2	245.609
Acau	Media Luna 1	228.639
Acau	Media Luna 2	189.754
Acau	Media Luna 2	174.406
Acau	Media Luna 2	358.465
Acau	Media Luna 2	143.465
Acau	Media Luna 2	250.883
Acau	Media Luna 2	286.538
Acau	Media Luna 3	140.768
Acau	Media Luna 3	214.82
Acau	Media Luna 3	447.635
Acau	Media Luna 3	404.524
Acau	Media Luna 4	198.873
Acau	Media Luna 4	144.166
Acau	Media Luna 4	177.486
Acau	Media Luna 4	238.249
Acau	Vivorillos 2	496.384
Acau	Vivorillos 2	275.871
Acau	Vivorillos 2	372.137
Acau	Vivorillos 2	226.523
Acau	Vivorillos 2	316.027
Acom	Becerros 1	35.3918
Acom	Becerros 1	28.9255
Acom	Becerros 1	18.6779
Acom	Becerros 1	22.6139
Acom	Becerros 1	45.4622
Acom	Caratasca 1	31.0992
Acom	Caratasca 1	45.187
Acom	Caratasca 1	29.0096
Acom	Caratasca 1	22.0541
Acom	Caratasca 1	33.784
Acom	Caratasca 1	44.3952
Acom	Media Luna 1	30.3936
Acom	Media Luna 1	19.0735
Acom	Media Luna 1	22.1511
Acom	Media Luna 1	22.3883
Acom	Media Luna 1	36.5461
Acom	Media Luna 2	40.8741
Acom	Media Luna 2	35.0382
Acom	Media Luna 2	26.6459
Acom	Media Luna 2	42.3188
Acom	Media Luna 2	43.6228
Acom	Media Luna 2	29.6002
Acom	Media Luna 3	38.7683
Acom	Media Luna 3	40.825
Acom	Media Luna 3	62.2336
Acon	Media Luna 2	21.1368
Acon	Media Luna 2	15.9955
Acon	Media Luna 2	21.9912
Acra	Media Luna 3	0.150317
Acra	Media Luna 3	1.33605
Acra	Media Luna 3	2.02294
Acra	Media Luna 4	1.4889
Acra	Media Luna 4	0.938399
Acra	Media Luna 4	2.61386
Aful	Caratasca 1	293.517
Aful	Caratasca 1	529.285
Aful	Caratasca 1	376.487
Aful	Caratasca 1	273.872
Aful	Caratasca 1	409.16
Aful	Caratasca 1	361.884
Aful	Caratasca 2	272.127
Aful	Caratasca 2	370.123
Aful	Caratasca 2	434.58
Aful	Media Luna 1	420.149
Aful	Media Luna 1	204.212
Aful	Media Luna 1	145.725
Aful	Media Luna 1	301.828
Aful	Media Luna 1	88.6482
Aful	Media Luna 1	359.184
Aful	Media Luna 2	347.381
Aful	Media Luna 2	370.107
Aful	Media Luna 2	266.965
Aful	Media Luna 4	263.666
Aful	Media Luna 4	82.6628
Aful	Media Luna 4	92.4147
Aful	Vivorillos 2	289.063
Aful	Vivorillos 2	287.704
Aful	Vivorillos 2	244.406
Awie	Becerros 1	21.326
Awie	Becerros 1	18.5156
Awie	Becerros 1	11.048
Awie	Becerros 1	17.5844
Awie	Becerros 1	23.6347
Awie	Media Luna 3	23.6844
Awie	Media Luna 3	27.6349
Awie	Media Luna 3	29.8234
Awie	Media Luna 3	14.1598
Awie	Vivorillos 1	22.6621
Awie	Vivorillos 1	24.5698
Ccar	Media Luna 2	249.066
Ccar	Media Luna 2	197.554
Ccar	Media Luna 2	315.97
Ccar	Media Luna 2	108.934
Ccar	Media Luna 2	166.919
Cfal	Becerros 2	35.6202
Cfal	Becerros 2	18.5893
Cfal	Becerros 2	31.2298
Cfal	Media Luna 2	2.56561
Cfal	Media Luna 2	5.99543
Cfal	Media Luna 2	16.1914
Cfal	Media Luna 2	29.7826
Cfal	Media Luna 3	48.0179
Cfal	Media Luna 3	34.7978
Cfal	Media Luna 3	33.8524
Cpli	Caratasca 1	25.9811
Cpli	Caratasca 1	59.8916
Cpli	Caratasca 1	8.52344
Cpli	Caratasca 1	29.0315
Cpli	Caratasca 1	21.5668
Cpli	Caratasca 1	15.3033
Cpli	Media Luna 2	20.2291
Cpli	Media Luna 2	9.22321
Cpli	Media Luna 2	12.23
Cpli	Media Luna 3	56.2255
Cvag	Caratasca 1	13.6059
Cvag	Caratasca 1	22.8749
Cvag	Caratasca 1	21.8153
Cvag	Caratasca 1	36.9865
Cvag	Caratasca 1	1.7089
Cvag	Caratasca 1	33.0678
Cvag	Media Luna 1	9.53224
Cvag	Media Luna 2	23.5691
Cvag	Media Luna 2	11.0775
Cvag	Media Luna 2	24.7785
Cvag	Media Luna 2	36.7429
Cvag	Media Luna 2	57.2627
Cvag	Media Luna 2	38.5118
Cvag	Media Luna 3	8.78275
Cvag	Media Luna 3	21.7735
Cvag	Media Luna 3	15.2847
Cvag	Media Luna 3	55.5833
Cvag	Vivorillos 2	17.9955
Cvag	Vivorillos 2	16.5138
Cvag	Vivorillos 2	19.1781
Cvag	Vivorillos 2	21.3883
Cvag	Vivorillos 2	22.8749
Cvag	Vivorillos 2	8.04854
Danc	Media Luna 4	47.615
Danc	Media Luna 4	49.855
Danc	Media Luna 4	69.7119
Danc	Media Luna 4	64.3261
Danc	Media Luna 4	53.1947
Danc	Media Luna 4	43.0267
Efer	Media Luna 3	81.0008
Efer	Media Luna 3	127.452
Efer	Media Luna 3	33.6117
Ibir	Becerros 2	44.0387
Ibir	Becerros 2	61.8205
Ibir	Becerros 2	52.2011
Ibir	Caratasca 1	74.5751
Ibir	Caratasca 1	74.0776
Ibir	Caratasca 1	69.746
Ibir	Caratasca 1	74.2871
Ibir	Caratasca 2	63.9353
Ibir	Caratasca 2	76.9959
Ibir	Caratasca 2	58.6843
Ibir	Media Luna 2	48.1548
Ibir	Media Luna 2	53.8989
Ibir	Media Luna 2	66.5373
Ibir	Media Luna 2	46.77
Ibir	Media Luna 3	50.3064
Ibir	Media Luna 3	67.3998
Ibir	Media Luna 3	51.2821
Ibir	Media Luna 3	63.9353
Ibir	Media Luna 3	51.3342
Ibir	Media Luna 3	43.8734
Ibir	Media Luna 3	75.9076
Ibir	Vivorillos 2	45.727
Ibir	Vivorillos 2	59.3515
Ibir	Vivorillos 2	71.2322
Ibir	Vivorillos 2	60.5937
Ibir	Vivorillos 2	87.0894
Icam	Becerros 2	397.947
Icam	Becerros 2	635.498
Icam	Caratasca 1	543.437
Icam	Caratasca 1	444.946
Icam	Caratasca 1	494.529
Icam	Caratasca 1	460.946
Icam	Caratasca 1	556.692
Icam	Caratasca 1	502.696
Icam	Media Luna 2	676.788
Icam	Media Luna 2	583.285
Icam	Media Luna 2	355.99
Icam	Media Luna 2	753.161
Icam	Media Luna 2	1014.13
Icam	Media Luna 3	605.526
Icam	Media Luna 3	700.044
Icam	Media Luna 3	1167.44
Marb	Media Luna 2	65.3678
Marb	Media Luna 2	52.4672
Marb	Media Luna 2	61.9516
Marb	Media Luna 2	78.861
Marb	Media Luna 2	66.6268
Marb	Media Luna 2	69.1192
Marb	Media Luna 3	60.1638
Marb	Media Luna 3	54.812
Marb	Media Luna 3	57.5736
Marb	Media Luna 3	59.096
Marb	Media Luna 3	49.6346
Marb	Media Luna 3	33.5726
Marb	Media Luna 3	29.6232
Marb	Media Luna 3	65.2971
Marb	Media Luna 3	43.3226
Mlae	Media Luna 2	62.2315
Mlae	Media Luna 2	19.0751
Mlae	Media Luna 2	22.0535
Mlae	Media Luna 2	223.217
Mlae	Media Luna 3	39.1286
Mlae	Media Luna 3	131.495
Mlae	Media Luna 3	21.9138
Mlae	Media Luna 3	382.527
Mlae	Media Luna 3	49.9582
Nere	Becerros 1	34.6533
Nere	Caratasca 1	38.0283
Nere	Caratasca 1	58.411
Nere	Caratasca 1	35.7548
Nere	Caratasca 1	31.7719
Nere	Caratasca 1	79.2778
Nere	Media Luna 2	26.9705
Nere	Media Luna 2	63.1478
Nere	Media Luna 2	37.8184
Nere	Media Luna 2	40.8371
Nere	Media Luna 2	12.8519
Nere	Media Luna 3	23.8097
Nere	Media Luna 3	27.1789
Nere	Media Luna 3	26.895
Nere	Media Luna 3	28.9854
Nere	Media Luna 3	19.4452
Nere	Vivorillos 2	35.5134
Nere	Vivorillos 2	42.8663
Nere	Vivorillos 2	32.2708
Nere	Vivorillos 2	34.1677
Nros	Becerros 2	1274.66
Nros	Vivorillos 1	353.842
Nros	Vivorillos 1	300.438
Nros	Vivorillos 1	440.103
Nros	Vivorillos 1	961.518
Nros	Vivorillos 1	592.167
Nros	Vivorillos 1	727.51
Nros	Vivorillos 1	1083.01
Vrig	Caratasca 1	127.548
Vrig	Caratasca 1	699.115
Vrig	Caratasca 1	225.698
Vrig	Caratasca 1	130.34
Vrig	Media Luna 1	113.528
Vrig	Media Luna 1	155.608
Vrig	Media Luna 1	142.912
Vrig	Media Luna 1	72.8707
Vrig	Media Luna 1	105.344
Vrig	Media Luna 1	149.001
Vrig	Media Luna 2	94.7355
Vrig	Media Luna 2	84.5623
Vrig	Media Luna 2	47.061
Vrig	Media Luna 3	299.541
Vrig	Media Luna 3	62.5372
Vrig	Media Luna 4	153.48
Vrig	Media Luna 4	87.2172
Vrig	Media Luna 4	149.043
Vrig	Vivorillos 1	71.1949
Vrig	Vivorillos 1	53.4291
Vrig	Vivorillos 1	72.492
Vrig	Vivorillos 1	89.3953
Vrig	Vivorillos 1	90.0126
Vrig	Vivorillos 2	59.256
Vrig	Vivorillos 2	152.608
